# Supplementary material for: Single Nucleotide Polymorphisms as a Biomarker in the Assessment of Oral Mucositis in Head and Neck Cancer Patients: A Systematic Review
Source: Preprints.org preprint supplement (doi:10.20944/preprints202312.2304.v1), 2023-12-29
Supplement: Supplementary file 1 [file supplementary]

Supplementary Table 1

| Studies | Selection 1 | Selection 2 | Selection 3 | Selection 4 | Comparability 1 | Results 1 | Results 2 | Results 3 | Total Points |
| --- | --- | --- | --- | --- | --- | --- | --- | --- | --- |
| Werbrouck 2009 | * | 0 | * | 0 | * | * | * | * | 6 |
| Patresi 2011 | * | 0 | * | 0 | 0 | * | * | * | 5 |
| Li 2013 | * | 0 | * | 0 | 0 | * | * | * | 5 |
| Venkatesh 2014 | * | 0 | * | 0 | 0 | * | * | * | 5 |
| Yu 2016 | * | 0 | * | 0 | 0 | * | * | 0 | 4 |
| Chen 2017 | * | 0 | * | 0 | 0 | * | * | * | 5 |
| Guo 2017 | * | 0 | * | 0 | 0 | * | * | * | 5 |
| Guo 2017 lng | * | 0 | * | 0 | 0 | * | * | 0 | 4 |
| Wang-Le 2017 | * | 0 | * | 0 | * | * | * | * | 6 |
| Le Z 2017 | 0 | 0 | * | 0 | 0 | * | * | * | 4 |
| Borchiellini 2017 | * | 0 | * | 0 | 0 | * | * | * | 5 |
| Reyes-Gibby 2017 | * | 0 | * | 0 | * | * | * | * | 6 |
| Brzozowska 2018 TNF | * | 0 | * | * | 0 | * | * | * | 6 |
| Brzozowska 2018 | * | 0 | * | 0 | * | * | * | * | 6 |
| Nanda 2018 | * | 0 | * | 0 | 0 | * | * | * | 5 |
| Duran 2019 | * | 0 | * | 0 | 0 | * | * | * | 5 |
| Yang 2019 | * | 0 | * | 0 | 0 | * | * | * | 5 |
| Gupta 2019 | * | 0 | * | * | 0 | * | * | * | 6 |
| Mlak TNFR 2020 | 0 | 0 | * | * | 0 | * | * | * | 5 |
| Mlak TNF Alfa 2020 | 0 | 0 | * | * | 0 | * | * | * | 5 |
| Yang 2020 | * | 0 | * | 0 | * | * | * | * | 6 |
| Raturi 2020 | * | 0 | * | 0 | * | * | * | * | 6 |
| Quinghua 2021 | * | 0 | * | 0 | * | * | * | * | 6 |
